# Supplementary material for: Impact of Fibroblast-Derived SPARC on Invasiveness of Colorectal Cancer Cells
Source: PubMed Central journal article supplement (PMC6827058; doi:10.3390/cancers11101421), 2019-09-24
Supplement: cancers-11-01421-s001.pdf [file cancers-11-01421-s001.pdf]

# Impact of Fibroblast-Derived SPARC on Invasiveness of Colorectal Cancer Cells

Daniel Drev, Felix Harpain, Andrea Beer, Anton Stift, Elisabeth S. Gruber, Martin Klimpfinger, Sabine Thalhammer, Andrea Reti, Lukas Kenner, Michael Bergmann and Brigitte Marian

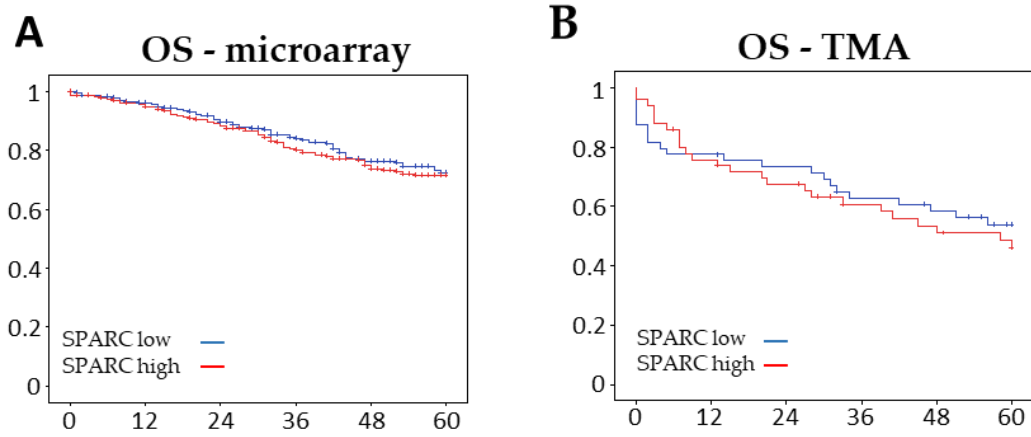

**Figure S1.** Overall-survival of CRC patients. **(A)** OS based on SPARC mRNA expression ( $n = 466$ ). **(B)** SPARC abundance of tissue microarrays and OS ( $n = 85$ ). Both Kaplan-Meier curves were plotted by using the median SPARC expression/abundance.

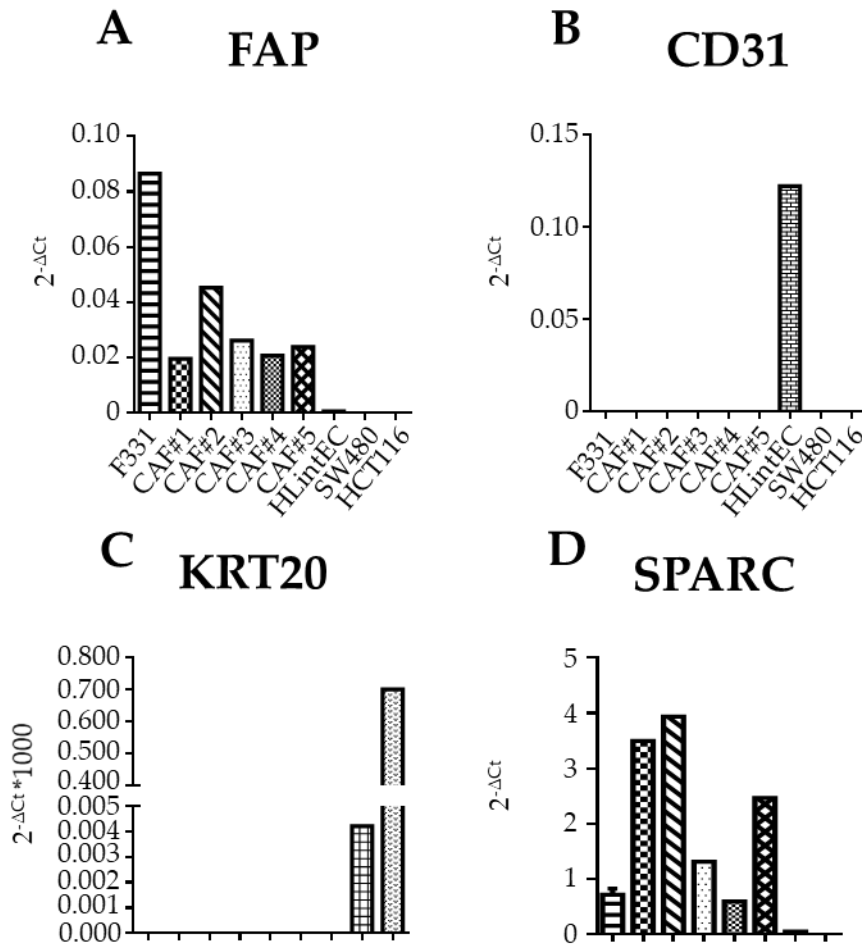

**Figure S2.** Expression of common markers of used cells. mRNA expression of the fibroblast activation protein alpha (FAP) (A) endothelial marker CD31 (B) colonic epithelial marker KRT20 (C) and SPARC (D) of various cells used. Human Large Intestine Microvascular Endothelial Cells (HLIntECs) were used as control.

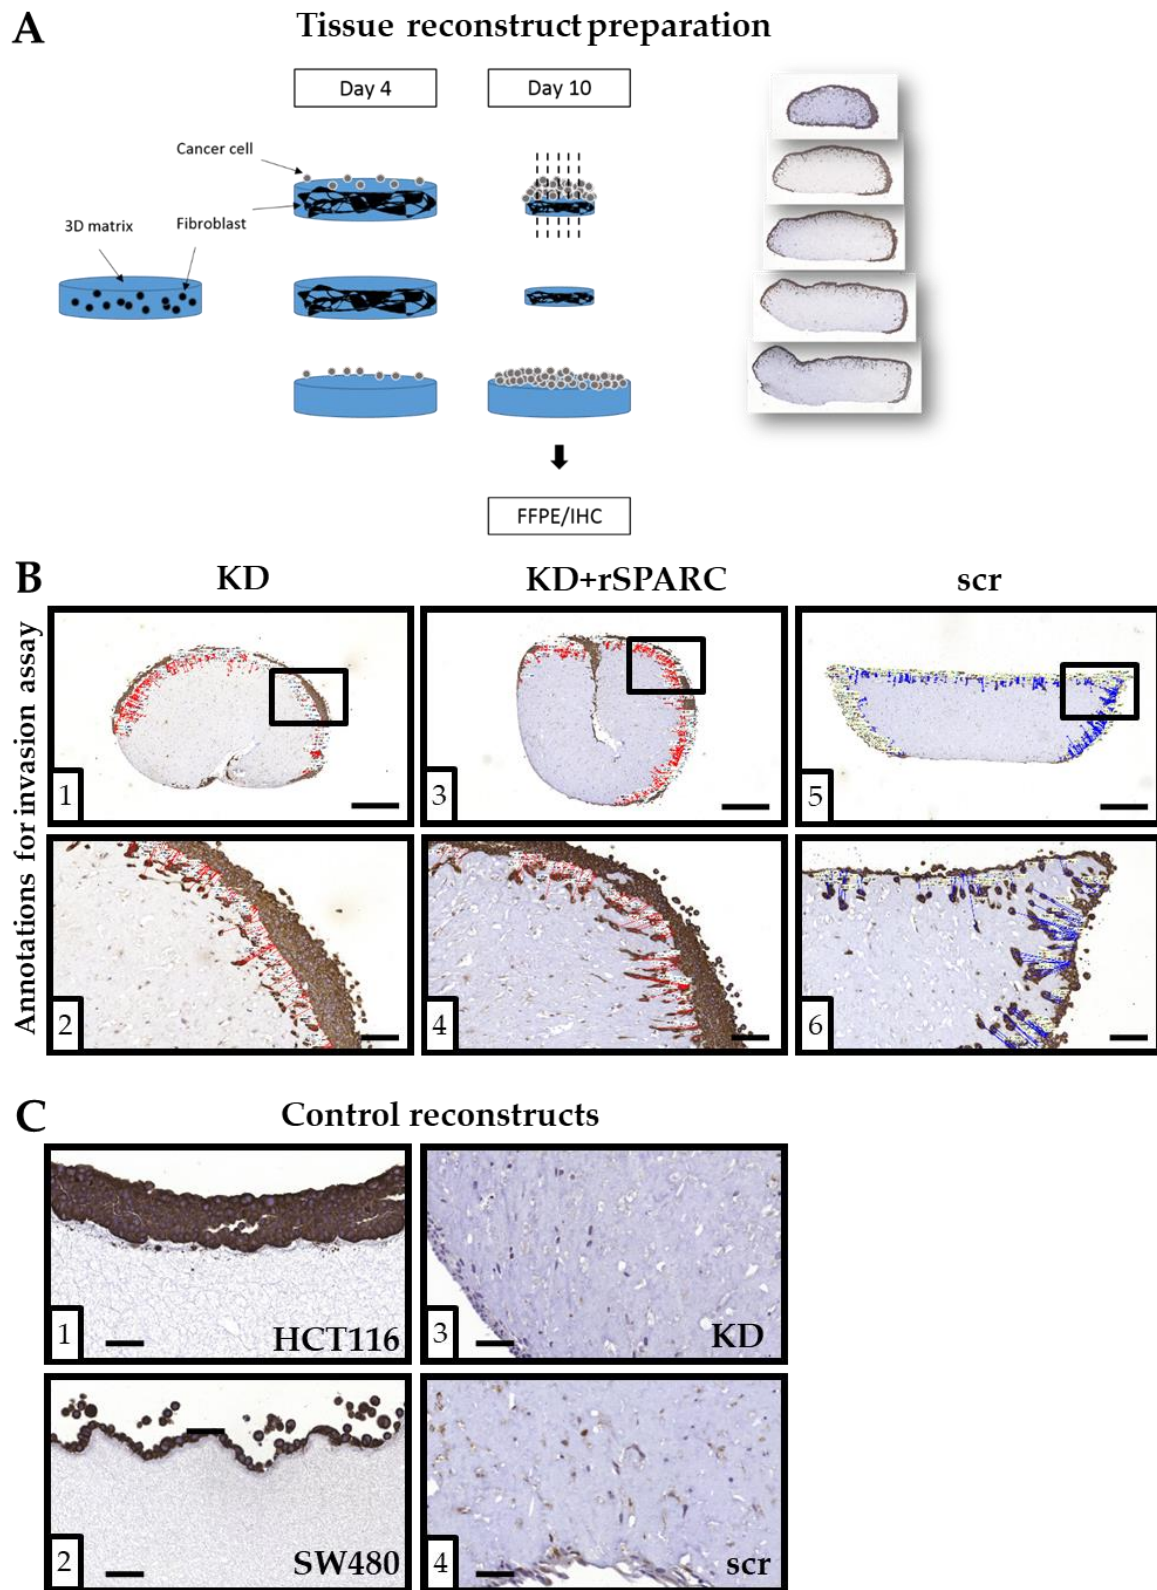

**Figure S3.** Tissue reconstruct preparation. Fibroblasts were suspended in collagen/methylcellulose and left for 4 days to structure the matrix before cancer cells were added. After 6 more days reconstructs were formalin-fixed, paraffin-embedded and sectioned, using five 4  $\mu$ m sections separated by 100  $\mu$ m for each reconstruct (A). Sections were pan-

cytokeratin stained to identify cancer cells. The invasion distance was measured as a straight line perpendicular to the border of the collagen substrate and the invading cancer cells (**B**). Size bars represent 500  $\mu\text{m}$  in upper panels and 100 $\mu\text{m}$  in lower. HCT116 (C(1)) and SW480 (C(2)) were seeded on empty gels, incubated for 10 days and processed for IHC with pan-cytokeratin antibody. SPARC-depleted (C(3)) or scr control F331 (C(4)) reconstructs were IHC stained for SPARC protein on day 10; Size bar = 50  $\mu\text{m}$ . IHC, immunohistochemistry; KD, knockdown; scr, scrambled.

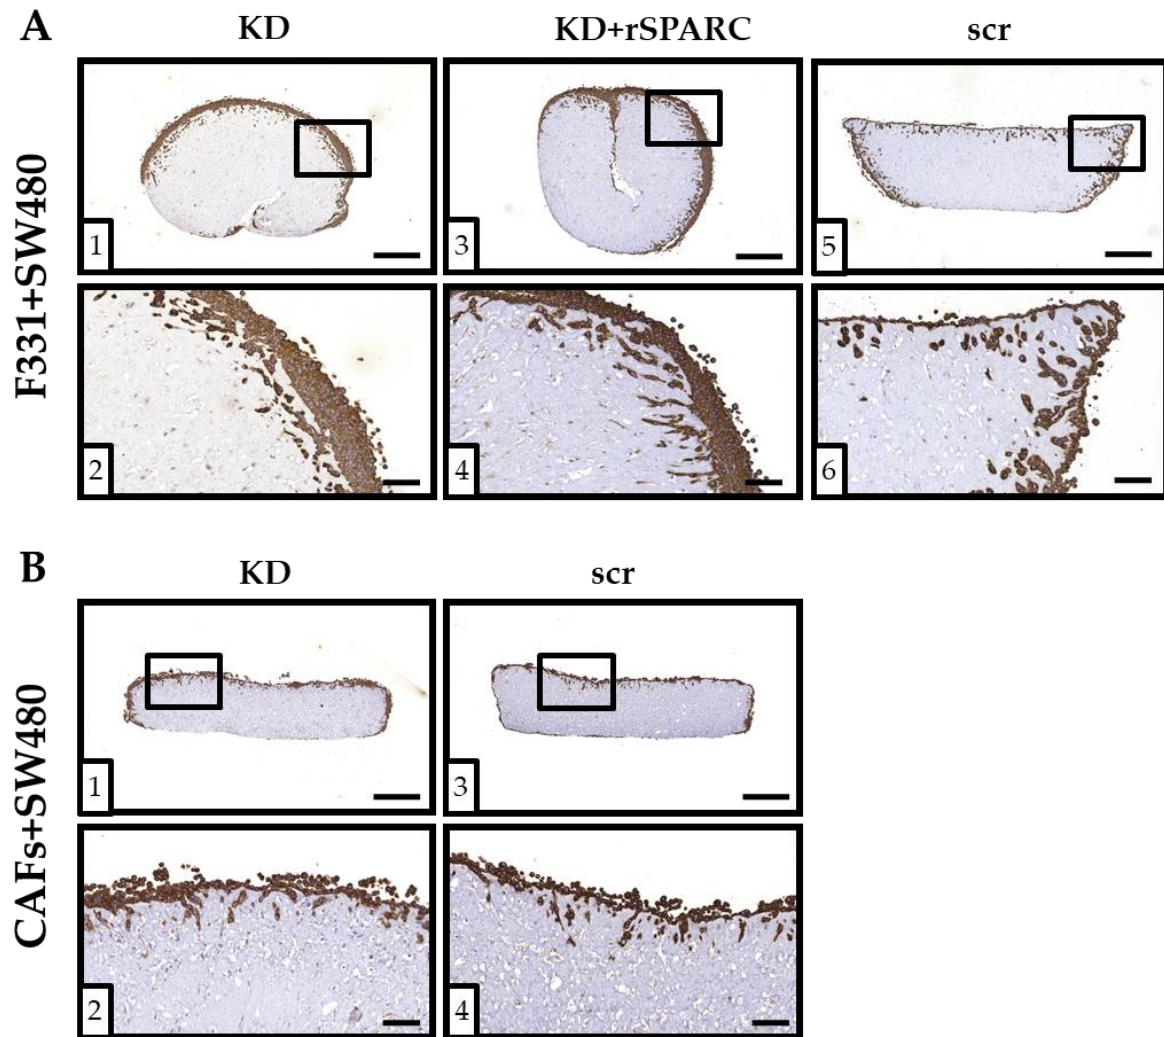

**Figure S4.** Invasion of SW480 cells. Typical examples of SW480 reconstruct sections co-cultured with either F331 (**A**) or CAFs (**B**) and IHC stained with an anti-cytokeratin antibody. Quantification is presented in Figure 6. Size bars represent 500  $\mu\text{m}$  in upper and 100  $\mu\text{m}$  in lower panels, respectively.

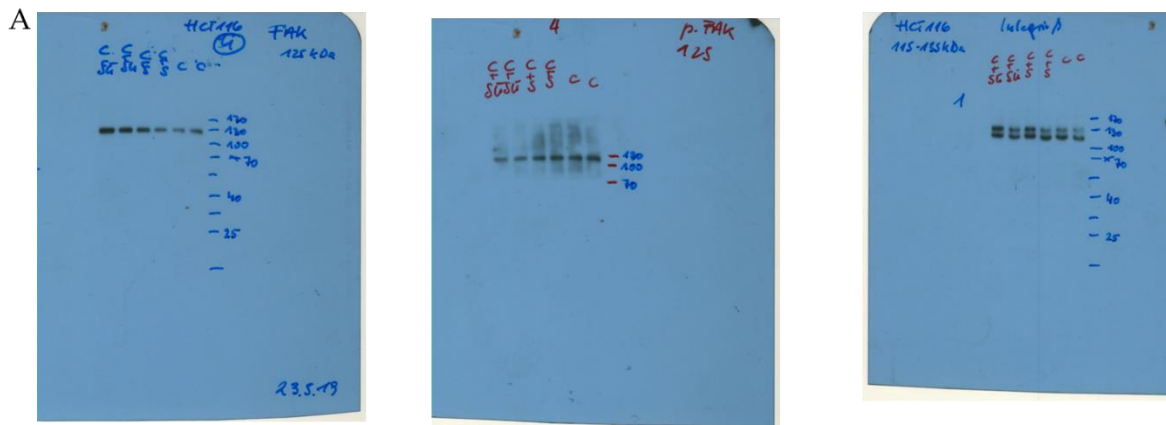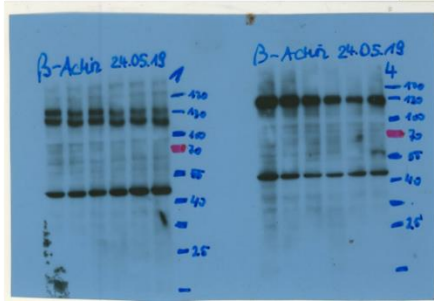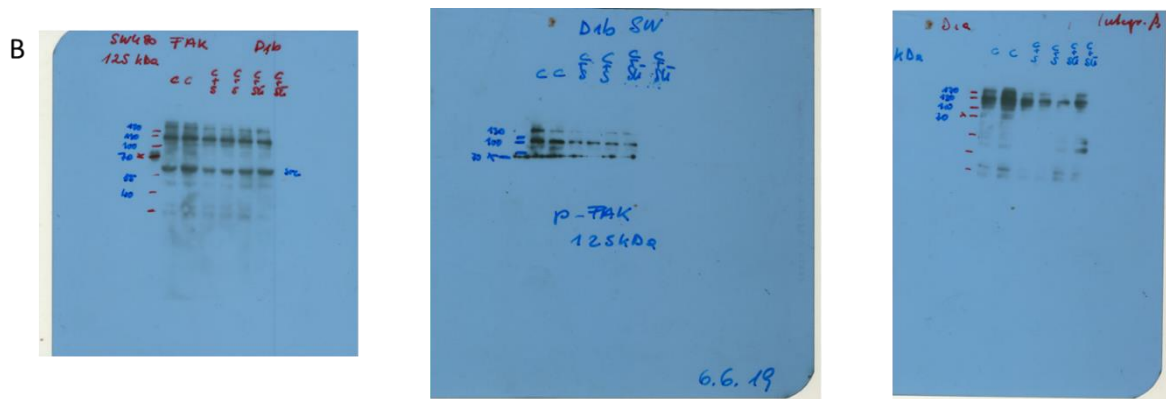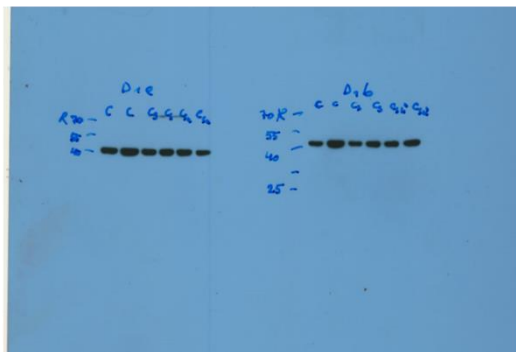

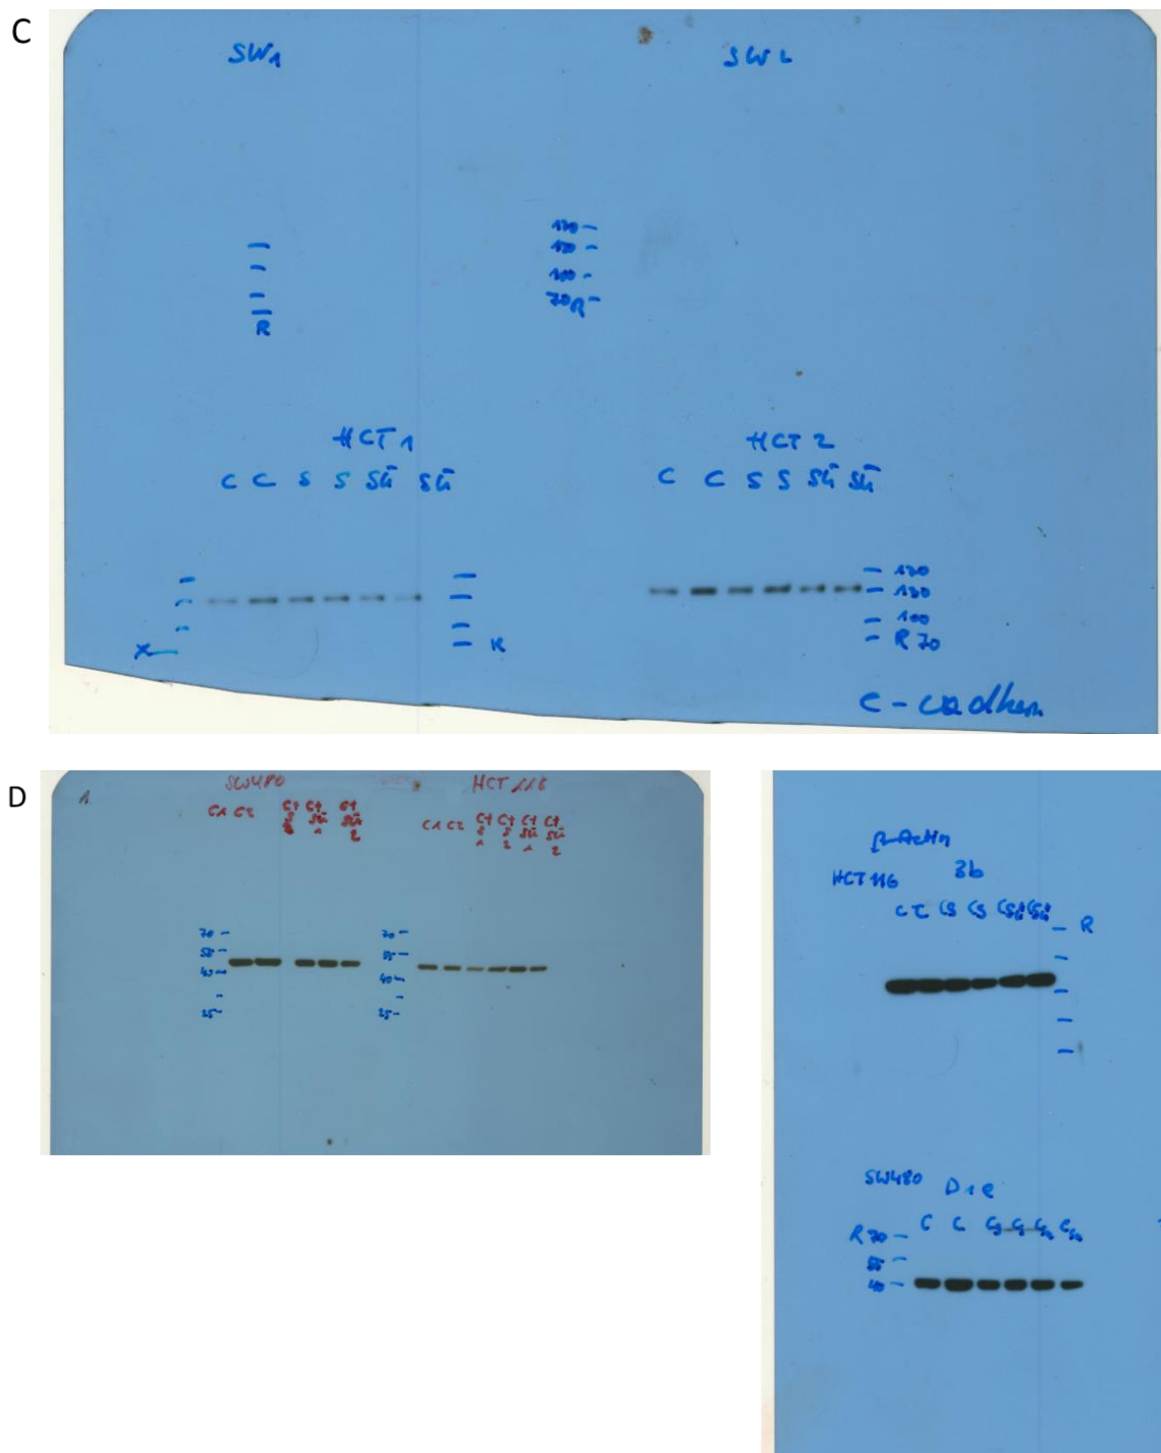

**Figure S5.** Uncropped scans. (A) Uncropped scans HCT116. Integrin  $\beta 1$  detected on blot 1; FAK & p-FAK on blot 4. (B). Uncropped scans SW480. Integrin  $\beta 1$  detected on blot 1a; FAK & p-FAK on blot 1b.  $\beta$ -actin detected on lower part of the blot. (C) Uncropped scans E-cadherin. Blots for both cell lines were exposed for the same time. (D)  $\beta$ -actin for the E-cadherin blots. For SW480 in experiment 1 one of the collagen/SPARC (Cs) groups was lost due to low protein concentration. Consequently, there were only 5 lanes on the blot. In experiment 2 there were 2 parallels for all experimental groups for both cell lines.

Table S1. Patient Clinical Data and SPARC Scores.

| ID | Sex_f_m | age | Proximal_Diatal | Staging | Ct_x | Progr_Dis | Prog_Dis_M_ax12 | Progr_Dis_M_ax60 | RFS_De_lay | RFS_Delay_M_ax12 | RFS_Max60_d_elay | OS_Status_M_ax60 | OS_Stat_us | Osdel_ay | OSdelay_M_ax60 | AverageSP_ARC | Epithl_S_Pos_n_y |
|----|---------|-----|-----------------|---------|------|-----------|-----------------|------------------|------------|------------------|------------------|------------------|------------|----------|----------------|---------------|------------------|
| 1  | 0       | 57  | 1               | 3       | 1    | 1         | 1               | 1                | 6          | 6                | 6                | 1                | 1          | 45       | 45             | 50.8          | 1                |
| 2  | 1       | 85  | 1               | 2       | 0    | 0         | 0               | 0                | 2          | 2                | 2                | 1                | 1          | 2        | 2              | 20.8          | 0                |
| 3  | 1       | 87  | 0               | 2       | 0    | 0         | 0               | 0                | 0          | 0                | 0                | 1                | 1          | 0        | 0              | 45.0          | 0                |
| 4  | 1       | 72  | 1               | 3       | 1    | 0         | 0               | 0                | 66         | 12               | 60               | 0                | 0          | 66       | 60             | 65.0          | 0                |
| 5  | 0       | 66  | 1               | 2       | 0    | 0         | 0               | 0                | 46         | 12               | 46               | 0                | 0          | 46       | 46             | 36.7          | 0                |
| 6  | 1       | 78  | 0               | 2       | 1    | 0         | 0               | 0                | 15         | 12               | 15               | 1                | 1          | 15       | 15             | 45.0          | 0                |
| 7  | 0       | 57  | 1               | 2       | 0    | 0         | 0               | 0                | 60         | 12               | 60               | 0                | 0          | 60       | 60             | 69.2          | 0                |
| 8  | 0       | 69  | 0               | 3       | 1    | 0         | 0               | 0                | 3          | 3                | 3                | 1                | 1          | 3        | 3              | 77.5          | 0                |
| 9  | 1       | 58  | 0               | 2       | 0    | 0         | 0               | 0                | 33         | 12               | 33               | 0                | 0          | 33       | 33             | 63.3          | 0                |
| 10 | 1       | 73  | 1               | 3       | 1    | 1         | 0               | 1                | 25         | 12               | 25               | 0                | 0          | 68       | 60             | 36.7          | 0                |
| 11 | 1       | 74  | 0               | 3       | 0    | 1         | 0               | 1                | 37         | 12               | 37               | 1                | 1          | 41       | 41             | 50.8          | 1                |
| 12 | 0       | 70  | 0               | 2       | 0    | 0         | 0               | 0                | 20         | 12               | 20               | 1                | 1          | 20       | 20             | 76.3          | 0                |
| 13 | 1       | 79  | 1               | 3       | 1    | 0         | 0               | 0                | 2          | 2                | 2                | 1                | 1          | 2        | 2              | 79.2          | 0                |
| 14 | 1       | 68  | 0               | 3       | 1    | 0         | 0               | 0                | 32         | 12               | 32               | 0                | 0          | 32       | 32             | 34.2          | 0                |
| 15 | 1       | 59  | 1               | 2       | 1    | 1         | 0               | 1                | 46         | 12               | 46               | 0                | 0          | 64       | 60             | 15.0          | 1                |
| 16 | 1       | 76  | 1               | 3       | 1    | 1         | 0               | 0                | 87         | 12               | 60               | 0                | 0          | 101      | 60             | 55.0          | 0                |
| 17 | 1       | 90  | 0               | 3       | 1    | 1         | 0               | 1                | 30         | 12               | 30               | 1                | 1          | 42       | 42             | 16.3          | 0                |
| 18 | 0       | 77  | 1               | 3       | 0    | 0         | 0               | 0                | 31         | 12               | 31               | 0                | 0          | 31       | 31             | 60.0          | 0                |
| 19 | 1       | 67  | 1               | 3       | 1    | 1         | 1               | 1                | 1          | 1                | 1                | 1                | 1          | 28       | 28             | 24.2          | 0                |
| 20 | 1       | 78  | 1               | 3       | 1    | 0         | 0               | 0                | 67         | 12               | 60               | 0                | 0          | 67       | 60             | 4.5           | 1                |
| 21 | 1       | 88  | 0               | 3       | 1    | 0         | 0               | 0                | 72         | 12               | 60               | 0                | 1          | 72       | 60             | 56.7          | 0                |
| 22 | 0       | 86  | 0               | 2       | 0    | 0         | 0               | 0                | 0          | 0                | 0                | 1                | 1          | 0        | 0              | 33.8          | 0                |
| 23 | 1       | 80  | 1               | 3       | 0    | 0         | 0               | 0                | 29         | 12               | 29               | 0                | 0          | 29       | 29             | 60.0          | 0                |
| 24 | 0       | 55  | 1               | 3       | 1    | 0         | 0               | 0                | 74         | 12               | 60               | 0                | 0          | 74       | 60             | 46.3          | 0                |
| 25 | 0       | 95  | 0               | 3       | 0    | 0         | 0               | 0                | 13         | 12               | 13               | 0                | 0          | 13       | 13             | 9.5           | 0                |
| 26 | 0       | 93  | 0               | 3       | 0    | 0         | 0               | 0                | 68         | 12               | 60               | 0                | 0          | 68       | 60             | 65.0          | 0                |
| 27 | 1       | 74  | 1               | 3       | 0    | 0         | 0               | 0                | 3          | 3                | 3                | 1                | 1          | 3        | 3              | 86.7          | 0                |
| 28 | 1       | 77  | 1               | 3       | 1    | 0         | 0               | 0                | 135        | 12               | 60               | 0                | 1          | 135      | 60             | 15.8          | 1                |
| 29 | 1       | 82  | 0               | 2       | 1    | 0         | 0               | 0                | 63         | 12               | 60               | 0                | 1          | 63       | 60             | 32.5          | 0                |
| 30 | 1       | 82  | 1               | 3       | 1    | 0         | 0               | 0                | 7          | 7                | 7                | 1                | 1          | 7        | 7              | 45.0          | 1                |
| 31 | 0       | 90  | 0               | 3       | 1    | 0         | 0               | 0                | 70         | 12               | 60               | 0                | 1          | 70       | 60             | 60.0          | 0                |
| 32 | 0       | 76  | 0               | 3       | 1    | 0         | 0               | 0                | 2          | 2                | 2                | 1                | 1          | 2        | 2              | 27.5          | 0                |
| 33 | 1       | 73  | 0               | 2       | 0    | 0         | 0               | 0                | 0          | 0                | 0                | 0                | 0          | 13       | 13             | 53.3          | 0                |
| 34 | 0       | 80  | 0               | 3       | 1    | 1         | 1               | 1                | 6          | 6                | 6                | 1                | 1          | 7        | 7              | 58.3          | 0                |
| 35 | 1       | 61  | 0               | 2       | 0    | 0         | 0               | 0                | 0          | 0                | 0                | 0                | 0          | 6        | 6              | 66.7          | 0                |
| 36 | 0       | 65  | 0               | 2       | 1    | 1         | 0               | 1                | 44         | 12               | 44               | 0                | 1          | 69       | 60             | 35.0          | 0                |
| 37 | 1       | 66  | 0               | 3       | 1    | 1         | 1               | 1                | 11         | 11               | 11               | 1                | 1          | 13       | 13             | 55.0          | 0                |
| 38 | 1       | 62  | 1               | 2       | 0    | 1         | 1               | 1                | 5          | 5                | 5                | 1                | 1          | 27       | 27             | 57.5          | 0                |
| 39 | 0       | 89  | 0               | 3       | 1    | 0         | 0               | 0                | 0          | 0                | 0                | 1                | 1          | 14       | 14             | 10.0          | 0                |
| 40 | 0       | 93  | 1               | 3       | 1    | 0         | 0               | 0                | 0          | 0                | 0                | 1                | 1          | 47       | 47             | 35.8          | 0                |
| 41 | 1       | 83  | 0               | 3       | 1    | 1         | 1               | 1                | 3          | 3                | 3                | 1                | 1          | 3        | 3              | 50.0          | 0                |

|    |   |    |   |   |   |   |   |   |     |    |    |   |   |     |    |      |   |
|----|---|----|---|---|---|---|---|---|-----|----|----|---|---|-----|----|------|---|
| 42 | 0 | 93 | 1 | 3 | 0 | 0 | 0 | 0 | 61  | 12 | 60 | 0 | 1 | 61  | 60 | 44.2 | 0 |
| 43 | 1 | 76 | 1 | 3 | 0 | 0 | 0 | 0 | 0   | 0  | 0  | 1 | 1 | 0   | 0  | 48.3 | 0 |
| 44 | 1 | 88 | 1 | 2 | 0 | 1 | 1 | 1 | 4   | 4  | 4  | 1 | 1 | 28  | 28 | 53.3 | 0 |
| 45 | 0 | 88 | 1 | 3 | 0 | 1 | 0 | 1 | 16  | 12 | 16 | 1 | 1 | 34  | 34 | 22.5 | 0 |
| 46 | 1 | 69 | 0 | 3 | 1 | 0 | 0 | 0 | 82  | 12 | 60 | 0 | 0 | 82  | 60 | 19.6 | 0 |
| 47 | 1 | 69 | 1 | 3 | 0 | 0 | 0 | 0 | 26  | 12 | 26 | 0 | 0 | 26  | 26 | 53.3 | 1 |
| 48 | 0 | 63 | 1 | 3 | 1 | 0 | 0 | 0 | 76  | 12 | 60 | 0 | 0 | 76  | 60 | 65.8 | 0 |
| 49 | 0 | 77 | 1 | 3 | 1 | 1 | 1 | 1 | 11  | 11 | 11 | 1 | 1 | 32  | 32 | 16.3 | 0 |
| 50 | 1 | 79 | 1 | 2 | 0 | 0 | 0 | 0 | 39  | 12 | 39 | 1 | 1 | 39  | 39 | 49.2 | 0 |
| 51 | 1 | 67 | 0 | 2 | 0 | 1 | 0 | 1 | 13  | 12 | 13 | 1 | 1 | 56  | 56 | 20.8 | 0 |
| 52 | 0 | 54 | 1 | 2 | 1 | 0 | 0 | 0 | 84  | 12 | 60 | 0 | 0 | 84  | 60 | 5.3  | 0 |
| 53 | 1 | 67 | 0 | 3 | 1 |   |   |   |     |    |    | 1 | 1 | 5   | 5  | 36.7 | 0 |
| 54 | 0 | 68 | 1 | 3 | 1 | 1 | 0 | 1 | 41  | 12 | 41 | 0 | 0 | 88  | 60 | 50.0 | 0 |
| 55 | 0 | 62 | 1 | 3 | 1 | 0 | 0 | 0 | 78  | 12 | 60 | 0 | 0 | 78  | 60 | 60.0 | 0 |
| 56 | 0 | 71 | 1 | 3 | 1 |   |   |   |     |    |    | 1 | 1 | 0   | 0  | 17.5 | 0 |
| 57 | 0 | 58 | 0 | 3 | 0 | 1 | 0 | 1 | 60  | 12 | 60 | 0 | 1 | 72  | 60 | 37.5 | 0 |
| 58 | 1 | 72 | 1 | 3 | 1 | 1 | 1 | 1 | 6   | 6  | 6  | 1 | 1 | 8   | 8  | 46.7 | 0 |
| 59 | 0 | 78 | 1 | 2 | 0 | 0 | 0 | 0 | 57  | 12 | 57 | 0 | 0 | 57  | 57 | 27.5 | 0 |
| 60 | 0 | 85 | 0 | 2 | 0 |   |   |   |     |    |    | 0 | 0 | 90  | 60 | 24.6 | 0 |
| 61 | 1 | 62 | 1 | 2 | 1 | 1 | 0 | 0 | 78  | 12 | 60 | 0 | 0 | 81  | 60 | 10.0 | 0 |
| 62 | 1 | 83 | 0 | 3 | 1 | 1 | 1 | 1 | 4   | 4  | 4  | 1 | 1 | 9   | 9  | 49.2 | 0 |
| 63 | 0 | 61 | 1 | 3 | 1 | 1 | 0 | 1 | 17  | 12 | 17 | 1 | 1 | 60  | 60 | 45.0 | 0 |
| 64 | 1 | 75 | 0 | 2 | 0 | 0 | 0 | 0 | 49  | 12 | 49 | 0 | 0 | 49  | 49 | 51.7 | 0 |
| 65 | 0 | 75 | 1 | 3 | 1 |   |   |   |     |    |    | 0 | 1 | 85  | 60 | 30.0 | 1 |
| 66 | 1 | 73 | 0 | 2 | 0 | 0 | 0 | 0 | 2   | 2  | 2  | 1 | 1 | 2   | 2  | 25.0 | 0 |
| 67 | 0 | 70 | 1 | 3 | 1 | 1 | 0 | 1 | 17  | 12 | 17 | 0 | 0 | 59  | 59 | 35.0 | 0 |
| 68 | 1 | 96 | 0 | 3 | 1 |   |   |   |     |    |    | 1 | 1 | 20  | 20 | 18.3 | 1 |
| 69 | 0 | 74 | 1 | 3 | 1 | 1 | 0 | 0 | 91  | 12 | 60 | 0 | 0 | 173 | 60 | 30.0 | 0 |
| 70 | 1 | 73 | 0 | 3 | 1 | 1 | 1 | 1 | 2   | 2  | 2  | 1 | 1 | 5   | 5  | 60.8 | 0 |
| 71 | 1 | 81 | 1 | 2 | 0 | 0 | 0 | 0 | 90  | 12 | 60 | 0 | 0 | 90  | 60 | 37.5 | 0 |
| 72 | 1 | 90 | 0 | 2 | 0 | 0 | 0 | 0 | 21  | 12 | 21 | 1 | 1 | 21  | 21 | 46.7 | 0 |
| 73 | 1 | 86 | 1 | 3 | 1 | 0 | 0 | 0 | 4   | 4  | 4  | 1 | 1 | 4   | 4  | 18.3 | 1 |
| 74 | 0 | 91 | 0 | 2 | 0 | 0 | 0 | 0 | 66  | 12 | 60 | 0 | 1 | 66  | 60 | 36.7 | 0 |
| 75 | 0 | 62 | 1 | 2 | 1 | 0 | 0 | 0 | 94  | 12 | 60 | 0 | 0 | 94  | 60 | 25.8 | 0 |
| 76 | 0 | 78 | 0 | 2 | 0 | 0 | 0 | 0 | 33  | 12 | 33 | 1 | 1 | 33  | 33 | 75.0 | 0 |
| 77 | 1 | 82 | 1 | 2 | 0 | 0 | 0 | 0 | 53  | 12 | 53 | 0 | 0 | 53  | 53 | 36.8 | 0 |
| 78 | 1 | 77 | 0 | 3 | 1 |   |   |   |     |    |    | 1 | 1 | 58  | 58 | 45.0 | 1 |
| 79 | 1 | 66 | 0 | 3 | 1 | 1 | 1 | 1 | 6   | 6  | 6  | 1 | 1 | 7   | 7  | 68.3 | 0 |
| 80 | 1 | 72 | 1 | 3 | 1 | 1 | 0 | 1 | 22  | 12 | 22 | 1 | 1 | 51  | 51 | 9.7  | 1 |
| 81 | 0 | 82 | 1 | 3 | 0 | 0 | 0 | 0 | 70  | 12 | 60 | 0 | 0 | 70  | 60 | 62.5 | 0 |
| 82 | 1 | 69 | 1 | 2 | 0 | 0 | 0 | 0 | 93  | 12 | 60 | 0 | 1 | 93  | 60 | 30.0 | 0 |
| 83 | 1 | 78 | 0 | 2 | 0 | 0 | 0 | 0 | 0   | 0  | 0  | 1 | 1 | 0   | 0  | 13.3 | 0 |
| 84 | 1 | 67 | 0 | 2 | 0 | 0 | 0 | 0 | 102 | 12 | 60 | 0 | 0 | 102 | 60 | 60.0 | 1 |
| 85 | 1 | 88 | 1 | 2 | 0 | 0 | 0 | 0 | 97  | 12 | 60 | 0 | 0 | 97  | 60 | 54.2 | 0 |
| 86 | 0 | 97 | 0 | 3 | 1 |   |   |   |     |    |    | 0 | 0 | 83  | 60 | 36.7 | 1 |
| 87 | 0 | 92 | 0 | 2 | 1 |   |   |   |     |    |    | 1 | 1 | 0   | 0  | 9.7  | 0 |

|    |   |    |   |   |   |   |   |   |     |    |    |   |   |     |    |      |   |
|----|---|----|---|---|---|---|---|---|-----|----|----|---|---|-----|----|------|---|
| 88 | 1 | 70 | 1 | 2 | 0 | 0 | 0 | 0 | 31  | 12 | 31 | 1 | 1 | 31  | 31 | 40.0 | 1 |
| 89 | 0 | 90 | 0 | 2 | 0 | 0 | 0 | 0 | 0   | 0  | 0  | 1 | 1 | 0   | 0  | 33.3 | 0 |
| 90 | 1 | 67 | 1 | 3 | 1 | 0 | 0 | 0 | 55  | 12 | 55 | 0 | 0 | 55  | 55 | 10.0 | 0 |
| 91 | 1 | 88 | 0 | 3 | 1 | 0 | 0 | 0 | 100 | 12 | 60 | 0 | 0 | 100 | 60 | 49.2 | 0 |
| 92 | 1 | 69 | 1 | 3 | 0 | 0 | 0 | 0 | 100 | 12 | 60 | 0 | 0 | 100 | 60 | 55.8 | 0 |
| 93 | 1 | 85 | 1 | 2 | 0 | 0 | 0 | 0 | 99  | 12 | 60 | 0 | 0 | 99  | 60 | 76.7 | 0 |
| 94 | 0 | 87 | 1 | 3 | 0 | 0 | 0 | 0 | 30  | 12 | 30 | 1 | 1 | 30  | 30 | 27.5 | 0 |
| 95 | 1 | 77 | 0 | 3 | 1 | 0 | 0 | 0 | 48  | 12 | 48 | 1 | 1 | 48  | 48 | 51.3 | 0 |
| 96 | 1 | 91 | 1 | 2 | 0 |   |   |   |     |    |    | 0 | 0 | 86  | 60 | 58.3 | 0 |
| 97 | 0 | 71 | 1 | 3 | 0 | 0 | 0 | 0 | 0   | 0  | 0  | 1 | 1 | 0   | 0  | 33.3 | 1 |
| 98 | 1 | 70 | 0 | 2 | 0 |   |   |   |     |    |    | 0 | 0 | 107 | 60 | 64.2 | 0 |
| 99 | 1 | 74 | 0 | 2 | 0 | 0 | 0 | 0 | 102 | 12 | 60 | 0 | 0 | 102 | 60 | 32.5 | 0 |



**Table S2.** Recurrent Patient clinical data.

| ID  | location primary | Therapy Mode                                                                   | Recurrence Location                 | Death |
|-----|------------------|--------------------------------------------------------------------------------|-------------------------------------|-------|
| 2   | sigmoideum       | Folfox/Bevazizumab; Folfiri/Bevazizumab; 5-FU/Bevazizumab                      | hepatic; pulmonary                  | 1     |
| 14  | sigmoideum       | Folfoxiri/Bevazizumab; Folfox/Bevazizumab                                      | hepatic                             | 0     |
| 15  | ascendens        | XELOX/Bevazizumab                                                              | hepatic                             | 1     |
| 22  | sigmoideum       | Folfox/Bevazizumab                                                             | pulmonary; osseous                  | 0     |
| 24  | rectum           | radiation (50.4Gy)/Xeloda; Xelox/Bevazizumab                                   | descendens; duodenal;<br>peritoneal | 0     |
| 25  | ascendens        | Xeloda                                                                         | ascendens (Anastomose)              | 1     |
| 28  | rectum           | Xelox/Bevazizumab; Folfiri/Bevazizumab                                         | hepatic; pulmonary                  | 1     |
| 46  | ascendens        | none due to patient's death                                                    | hepatic                             | 1     |
| 48  | ascendens        | Xeloda; Xelox after recurrence                                                 | lig. Rotundum                       | 1     |
| 50  | ascendens        | Xelox                                                                          | hepatic                             | 1     |
| 51  | sigmoideum       | Xeloda/Bevazizumab; Cetuximab; Erbitux                                         | hepatic                             | 1     |
| 55  | ascendens        | Xelox                                                                          | osseous                             | 1     |
| 60  | sigmoideum       | Folfiri; Folfiri; Folfox/Bevazizumab                                           | hepatic; pulmonary                  | 1     |
| 61  | sigmoideum       | palliative therapy indicated; patient dies prior to implementation             | pulmonary; mediastinal,<br>osseous  | 1     |
| 65  | sigmoideum       | radiation therapy                                                              | hepatic; pelvic                     | 1     |
| 68  | descendens       | Folfox; resection of lung metastasis                                           | hepatic; pulmonary                  | 1     |
| 73  | sigmoideum       | Folfox; Folfiri/Panitumab                                                      | hepatic                             | 0     |
| 78  | descendens       | Folfox/Cetuximab; Folfiri/Cetuximab; Cetuximab mono                            | hepatic                             | 1     |
| 79  | sigmoideum       | Bevazizumab; Irinotecan/Cetuximab                                              | hepatic                             | 1     |
| 84  | sigmoideum       | Xeloda; after HIPEC Xelox/Bevazizumab                                          | peritoneal                          | 0     |
| 87  | ascendens        | Xelox                                                                          | hepatic                             | 1     |
| 89  | sigmoideum       | Xelox/Radiation of hepatic lesion; Folfiri/Erbitux; Folfiri/Cetuximab          | hepatic; pulmonary                  | 1     |
| 101 | rectum           | Xelox, Xeliri/Bevazizumab; Folfiri/Cetuximab; Docetaxel;<br>Xeloda/Bevazizumab | pulmonary                           | 0     |
| 108 | rectum           | Irinotecan/5-FU; Xelox                                                         | ascendens, hepatic                  | 0     |
| 109 | ascendens        | Irinotecan                                                                     | hepatic; abdominal                  | 1     |
| 120 | ascendens        | Xelox, terminated due to patient general condition                             | hepatic                             | 1     |
| 121 | sigmoideum       | Xeloda/Oxaliplatin; Xeliri/Erbitux; Xelox/Bevazizumab;<br>Sutent/Xeloda        | peritoneal                          | 1     |

HIPEC: hyperthermic intraperitoneale chemoperfusion.

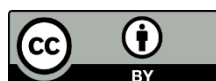

© 2019 by the authors. Licensee MDPI, Basel, Switzerland. This article is an open access article distributed under the terms and conditions of the Creative Commons Attribution (CC BY) license (<http://creativecommons.org/licenses/by/4.0/>).
